# Supplementary material for: Omics Approaches in Drug Development against Leishmaniasis: Current Scenario and Future Prospects
Source: MDPI journal article supplement (doi:10.3390/pathogens12010039), 2022-12-26
Supplement: s1 [file s1]

**Supplementary Table S1.** Differentially regulate protein in *L. infantum* amastigote and promastigote form in Lynn et al (2003).

| Accession number (DB database) | Proteins                                             |
|--------------------------------|------------------------------------------------------|
| LinJ13.1520                    | Hypothetical protein, conserved                      |
| LinJ14.0700                    | Fatty acid elongase                                  |
| LinJ27.1630                    | Hypothetical protein, conserved                      |
| LinJ24.1700                    | Succinate dehydrogenase flavoprotein                 |
| LinJ16.1510                    | Paraflagellar rod protein 2C                         |
| LinJ29.1890                    | Paraflagellar rod protein 1D                         |
| LinJ35.2020                    | Hypothetical protein, unknown function               |
| LinJ11.0600                    | 3-Methylcrotonoyl-CoA carboxylase beta subunit       |
| LinJ35.5360                    | Polyadenylate-binding protein 1                      |
| LinJ28.0520                    | Hypothetical protein, conserved                      |
| LinJ08.1010                    | Stress-induced protein, sti1                         |
| LinJ12.0665                    | Surface antigen protein 2                            |
| LinJ30.0920                    | Surface protein amastin                              |
| LinJ09.0980                    | Calmodulin                                           |
| LinJ24.0870                    | Triosephosphate isomerase                            |
| LinJ36.2330                    | Hypothetical protein, conserved                      |
| LinJ25.1670                    | Hypothetical protein, conserved                      |
| LinJ10.0490                    | GP63-1, leishmanolysin                               |
| LinJ17.1390                    | Translation initiation factor                        |
| LinJ17.0010                    | Hypothetical protein, conserved                      |
| LinJ31.3270                    | Hypothetical protein, conserved                      |
| LinJ31.2650                    | Ubiquinol-cytochrome-c reductase                     |
| LinJ18.1500                    | H1A-1P-type H <sup>+</sup> -ATPase                   |
| LinJ16.1390                    | Cytochrome c                                         |
| LinJ20.1350                    | SMP-1, small myristoylated protein-1, putative       |
| LinJ35.2270                    | KMP11-2, kinetoplastid membrane                      |
| Amastigote                     |                                                      |
| LinJ07.0060                    | Alpha-adaptin-like protein                           |
| LinJ13.0810                    | Hypothetical protein, conserved                      |
| LinJ35.1490                    | Arginase                                             |
| LinJ30.1370                    | Hypothetical protein, unknown function               |
| LinJ11.1170                    | Hypothetical protein, conserved                      |
| LinJ28.2430                    | Glycosomal membrane protein                          |
| LinJ17.0110                    | Elongation factor 1-alpha                            |
| LinJ29.0860                    | Cysteine peptidase C (CPC)                           |
| LinJ31.1240                    | Vacuolar-type proton translocating pyrophosphatase 1 |
| LinJ16.0960                    | Sucrose-phosphate synthase-like protein              |
| LinJ29.2310                    | GTP-binding protein                                  |
| LinJ21.1170                    | Histone H2A                                          |
| LinJ30.3000                    | Glyceraldehyde 3-phosphate dehydrogenase, glycosomal |
| LinJ21.0310                    | Hexokinase                                           |

|             |                                        |
|-------------|----------------------------------------|
| LinJ35.1220 | Hypothetical protein, conserved        |
| LinJ16.0560 | Orotidine-5-phosphate decarboxylase    |
| LinJ29.2620 | ATP-dependent phosphofructokinase      |
| LinJ35.0680 | Hypothetical protein, conserved        |
| LinJ15.1120 | TRYPtryparedoxin peroxidase            |
| LinJ27.1900 | FtsJ cell division protein             |
| LinJ07.1020 | Splicing factor ptsr1-like protein     |
| LinJ25.1790 | Pyruvate dehydrogenase E1 beta subunit |
| LinJ33.0300 | Hypothetical protein, conserved        |

**Supplementary Table S2.** Differentially regulate protein in *L. mexicana* amastigote and promastigote form in Lynn et al (2003).

| Accession number (DB database) | Proteins                              |
|--------------------------------|---------------------------------------|
| LinJ33.1030                    | Hypothetical protein, conserved       |
| LinJ09.0950                    | Polyubiquitin                         |
| LinJ16.0750                    | Hypothetical protein, unknown         |
|                                | function                              |
| LinJ21.0310                    | Hexokinase, putative                  |
| LinJ32.0410                    | ATP-dependent RNA helicase, putative  |
| LinJ11.1000                    | Pyruvate phosphate dikinase, putative |
| LinJ35.2270                    | KMPH-2kinetoplastid membrane          |
|                                | protein-11                            |

**Supplementary Table S3.** Uniquely expressed proteins in *L. infantum* amastigote form in McNicoll et al. 2006.

| <b>Proteins</b>                                    |
|----------------------------------------------------|
| Hypothetical protein, unknown function             |
| Hypothetical protein, conserved                    |
| ATP-dependent DEAD/H RNA helicase,                 |
| Hypothetical protein, unknown function             |
| Hypothetical protein, conserved                    |
| Seryl-tRNA synthetase, putative                    |
| Carboxypeptidase, putative                         |
| Pyrroline-5-carboxylate reductase                  |
| Myo-inositol-1-phosphate synthase                  |
| Thiol specific antioxidant                         |
| Heat-shock protein, putative                       |
| Peptidylprolyl isomerase-like protein              |
| La RNA binding protein, putative                   |
| Hypothetical protein, conserved                    |
| Acetyl-CoA synthetase, putative                    |
| Hypothetical protein, unknown function             |
| Protein disulfide isomerase, putative              |
| 6-Phosphogluconolactonase                          |
| Heat-shock protein hsp70, putative                 |
| Aspartyl aminopeptidase, putative                  |
| Hypothetical protein, unknown function             |
| Heat-shock 70-related protein 1, t.                |
| TPR domain protein, conserved                      |
| Cytoskeleton-associated protein CAP5.5             |
| Prostaglandin f2-alpha synthase                    |
| Calreticulin, putative                             |
| Hypothetical protein, conserved                    |
| Chaperonin containing t-complex protein,           |
| Hypothetical protein, conserved                    |
| Proteasome regulatory non-ATPase sub.,<br>putative |
| 3-Hydroxyisobutyryl-coenzyme a<br>hydrolase-like   |
| Heat-shock protein 83-1                            |
| Mitogen activated protein kinase, putative         |
| Peptidase M20/M25/M40, putative                    |
| Glucose-6-phosphate dehydrogenase                  |
| d-Isomer specific 2-hydroxyacid<br>dehydrogenase   |
| Hypothetical protein, unknown function             |
| Hypothetical protein, unknown function             |
| Hypothetical protein, conserved                    |
| Proteasome activator protein pa26,<br>putative     |
| Fructose-1,6-bisphosphate aldolase                 |

|                                           |
|-------------------------------------------|
| Transitional endoplasmic reticulum        |
| ATPase, putative                          |
| Chaperonin Hsp60, Mitochondrial precursor |

**Supplementary Table S4.** Differentially expressed protein of Leifso et al. (2007) study.

| Accession number (DB database) | Protein name                                                       |
|--------------------------------|--------------------------------------------------------------------|
| LinJ21.0350                    | Hypothetical protein, conserved                                    |
| LinJ36.4560                    | Chaperonin HSP60, mitochondrial                                    |
| LinJ21.0140                    | Precursor hexokinase, putative                                     |
| LinJ02.0380                    | Hypothetical protein, conserved                                    |
| LinJ32.3680                    | Ribosomal protein l3, putative                                     |
| LinJ27.1480                    | Hypothetical protein, unknown function                             |
| LinJ10.1330                    | Histone h3                                                         |
| LinJ13.0090                    | Carboxypeptidase, putative                                         |
| LinJ27.0150                    | Methylmalonyl-coenzyme a mutase, putative                          |
| LinJ04.0970                    | 60S ribosomal protein L10, putative                                |
| LinJ30.4300                    | 60S ribosomal protein L9, putative                                 |
| LinJ36.1640                    | 40s ribosomal protein s10, putative                                |
| LinJ19.1440                    | Peptidylprolyl isomerase-like protein                              |
| LinJ32.0770                    | ATP-dependent RNA helicase, putative                               |
| LinJ31.2550                    | Prostaglandin f2-alpha synthase                                    |
| LinJ25.1040                    | Hypothetical protein, conserved                                    |
| LinJ35.3330                    | Cystathione gamma lyase, putative                                  |
| LinJ36.2470                    | Elongation factor 2                                                |
| LinJ06.0010                    | Histone h4                                                         |
| LinJ21.1910                    | Histone H4                                                         |
| LinJ17.0500                    | Hypothetical protein, conserved                                    |
| LinJ18.0220                    | RNA-binding protein, putative                                      |
| LinJ22.1590                    | Hypothetical protein, unknown function                             |
| LinJ30.0670                    | Kinesin, putative                                                  |
| LinJ24.1500                    | Hypothetical protein, conserved                                    |
| LinJ07.1050                    | RNA binding protein-like protein                                   |
| LinJ30.2810                    | Heat shock 70-related protein 1, mitochondrial precursor, putative |
| LinJ36.1010                    | Dihydrolipoamide acetyltransferase precursor, putative             |
| LinJ35.0510                    | 40S ribosomal protein S3a, putative                                |
| LinJ33.1290                    | Hypothetical protein                                               |
| LinJ28.1430                    | Haloacid dehalogenase-like hydrolase, putative                     |

|             |                                                |
|-------------|------------------------------------------------|
| LinJ26.1920 | Mitotubule-associated protein Gb4, putative    |
| LinJ21.0390 | DNAJ protein, putative                         |
| LinJ06.0370 | Glutamine synthetase, putative                 |
| LinJ26.1930 | Hypothetical protein, conserved                |
| LinJ33.2870 | Hypothetical protein, unknown function         |
| LinJ19.0040 | Histone H2B                                    |
| LinJ19.0040 | Histone H2B                                    |
| LinJ36.4490 | Phosphomannomutase, putative                   |
| LinJ28.2790 | Hypothetical protein, conserved                |
| LinJ28.0550 | Ribosomal protein s26, putative                |
| LinJ30.0330 | 3-Oxoacid CoA transferase 1                    |
| LinJ30.0630 | Hypothetical protein, conserved                |
| LinJ36.2700 | Hypothetical protein, conserved                |
| LinJ07.1300 | Hypothetical protein, conserved                |
| LinJ08.1170 | Beta tubulin                                   |
| LinJ25.0730 | Hypothetical protein, conserved                |
| LinJ32.2360 | ATP-dependent zinc metallopeptidase, putative  |
| LinJ25.0780 | Protein phosphatase, putative                  |
| LinJ32.3870 | Dihydrolipoamide dehydrogenase, putative       |
| LinJ13.0810 | Hypothetical protein, conserved                |
| LinJ14.0980 | Immunodominant antigen, putative               |
| LinJ25.1120 | Hypothetical protein, conserved                |
| LinJ23.0400 | NADP-dependent alcohol dehydrogenase, putative |
| LinJ27.1680 | Hypothetical protein, conserved                |
| LinJ18.0740 | Elongation factor TU, putative                 |
| LinJ05.0380 | Microtubule-associated protein, putative       |
| LinJ14.1250 | Enolase                                        |
| LinJ14.1250 | Enolase                                        |

**Supplementary Table S5.** Up regulated expressed proteins in *L. major* in Ashrafmansouri et al. (2020).

| <b>Protein ID (STRING database)</b> | <b>Protein name</b>                                                            |
|-------------------------------------|--------------------------------------------------------------------------------|
| O62591                              | Probable eukaryotic initiation factor 4A                                       |
| Q4QEB3                              | GMP reductase                                                                  |
| Q4QG98                              | 60S ribosomal protein L18                                                      |
| E9ABZ4                              | Putative carboxylase                                                           |
| E9ACG7                              | Putative delta-1-pyrroline-5-carboxylate dehydrogenase                         |
| E9AD07                              | Putative methylmalonyl-coenzyme a mutase                                       |
| E9ADF9                              | Putative glycosomal phosphoenolpyruvate carboxykinase                          |
| E9ADX3                              | Tryparedoxin                                                                   |
| E9AE57                              | Putative fumarate hydratase                                                    |
| E9AEU1                              | Putative NADH-dependent fumarate reductase                                     |
| E9AFK3                              | Putative 60S ribosomal protein L23                                             |
| E9AFP0                              | Polyadenylate-binding protein                                                  |
| Q07DU5                              | Peroxidoxin 2                                                                  |
| Q4QF5                               | Dihydrolipoamide acetyltransferase component of pyruvate dehydrogenase complex |
| Q4Q11R4                             | Putative universal minicircle sequence binding protein                         |
| Q4Q259                              | Elongation factor 2                                                            |
| Q4Q2H7                              | Putative vacuolar ATP synthase catalytic subunit-A                             |
| Q4Q745                              | Putative heat shock 70-related protein 1, mitochondrial                        |
| Q4Q838                              | Putative glycosomal membrane protein                                           |
| Q4Q9H4                              | Putative 60S ribosomal protein L7                                              |
| Q4Q9M4                              | Succinate-CoA ligase (ADP-forming) subunit alpha, mitochondrial                |
| Q4Q9R2                              | Polyprenolreductase                                                            |
| Q4Q9Y0                              | Putative cytochrome c oxidase VII                                              |
| Q4QAP8                              | Triosephosphateisomerase                                                       |
| Q4QEM2                              | Paraflagellar rod protein 2C                                                   |
| Q4QEX4                              | Putative 60S ribosomal protein L21                                             |
| Q4QF42                              | Putative nucleolar RNA binding protein                                         |
| Q4QFG2                              | Putative 60S ribosomal protein L13a                                            |
| Q4QFP8                              | Putative small myristoylated protein-3                                         |
| Q4QG31                              | 40S ribosomal protein S4                                                       |
| Q4QGN9                              | Glucose-6-phosphate isomerase                                                  |
| Q4QI59                              | Uncharacterized protein                                                        |
| Q4QJ88                              | V-type proton ATPase subunit                                                   |
| Q9XZX2                              | Putative ADP-ribosylation factor                                               |

**Supplementary Table S6.** Up regulate expressed proteins in *L. tropica* in Ashrafmansouri et al. (2020) study data access through STRING database

| <b>Protein ID</b> | <b>Proteins</b>                          |
|-------------------|------------------------------------------|
| E9AEB3            | ATP-dependent<br>6-phosphofructokinase   |
| E9AEX6            | Putative reiske iron–sulfur protein      |
| E9AF23            | 40S ribosomal protein S6                 |
| Q4Q5N9            | Putative prostaglandin f synthase        |
| Q4Q5P5            | Putative ATP-dependent RNA helicase      |
| Q4Q8V7            | Putative 60S ribosomal protein L35       |
| Q4Q9Y1            | Aldehyde dehydrogenase, mitochondrial    |
| Q4QBD7            | Putative cytochrome c oxidase subunit 10 |
| Q4QBH2            | Peroxidoxin                              |
| Q4QCE1            | Putative 60S ribosomal protein L36       |
| Q4QDK0            | ATP/ADP translocase                      |
| Q4QDX9            | Putative 60S ribosomal protein<br>L10a   |
| Q4QEX6            | Putative fucose kinase                   |
| Q4QIP1            | Putative 60S ribosomal protein L7a       |
| Q4QJF1            | ATPase alpha subunit                     |
| Q4VT70            | Phosphotransferase                       |
| Q9U0V9            | Possible 3-ketoacyl-CoA thiolase         |

**Supplementary Table S7.** Fialho junior et al. (2021) describe a protein that is differentially expressed in the amastigote form of *L. infantum* in KEGG pathway

| Proteins                                             |
|------------------------------------------------------|
| ATPase beta subunit                                  |
| Dihydrolipoamide dehydrogenase                       |
| Enolase                                              |
| Fructose-1,6-bisphosphate aldolase                   |
| Glutamate dehydrogenase                              |
| Glyceraldehyde 3-phosphate dehydrogenase, glycosomal |
| Pyruvate dehydrogenase E1 component alpha subunit    |
| Transaldolase                                        |
| Triosephosphate isomerase                            |
| Tryparedoxin peroxidase                              |
| <b>Ribosome</b>                                      |
| 40S ribosomal protein S11                            |
| 40S ribosomal protein S13                            |
| 40S ribosomal protein S3                             |
| 60S ribosomal protein L18a                           |
| 60S ribosomal protein L6                             |
| 60S ribosomal protein L9                             |



**Supplementary Table S8.** Filaho junior et al. (2021) used the STRING database to access a differentially expressed protein in the *L. infantum* promastigote form.

| Proteins                                                    |
|-------------------------------------------------------------|
| Molecular function (GO)                                     |
| Nucleic acid binding                                        |
| 40S ribosomal protein S2                                    |
| 40S ribosomal protein S3, putative                          |
| 60S ribosomal protein L5, putative                          |
| ATP-dependent RNA helicase                                  |
| Conserved hypothetical protein LinJ.13.0270                 |
| Conserved hypothetical protein LinJ.27.1220                 |
| Eukaryotic initiation factor 4a, putative                   |
| Histone H2A                                                 |
| Histone H3                                                  |
| Histone H3 variant, putative                                |
| RNA-binding protein, putative                               |
| RNA helicase                                                |
| RNA-binding protein, putative, UPB1                         |
| RNA-binding protein, putative, UPB2                         |
| Cellular component (GO)                                     |
| Nucleo                                                      |
| Histone H2A                                                 |
| Histone H3                                                  |
| Histone H3 variant, putative                                |
| U3 small nucleolar ribonucleoprotein protein MPP10          |
| KEGG pathways                                               |
| Metabolic pathways                                          |
| 2,3-Bisphosphoglycerate-independent phosphoglycerate mutase |
| 3-Ketoacyl-CoA thiolase                                     |
| ATPase beta subunit                                         |
| Dihydrolipoamide dehydrogenase                              |

Enolase

Fructose-1,6-bisphosphate aldolase

Hexokinase

Isocitrate dehydrogenase [NADP], mitochondrial precursor

Orotidine-5-phosphate decarboxylase/orotate phosphoribosyltransferase

Peroxidoxin

Phosphomannomutase

Pyruvate dehydrogenase E1 beta subunit

Reiske iron-sulfur protein precursor

S-adenosylhomocysteine hydrolase

Spermidine synthase

Succinyl-CoA ligase [GDP-forming] beta-chain

Trypanothione reductase

Tryparedoxin peroxidase

UDP-glucose pyrophosphorylase

Vacuolar ATP synthase subunit b

Ribosome

40S ribosomal protein S12

40S ribosomal protein S2

40S ribosomal protein S27-1

40S ribosomal protein S3

40S ribosomal protein S6

60S ribosomal protein L19

60S ribosomal protein L19

60S ribosomal protein L23

60S ribosomal protein L27A/L29

60S ribosomal protein L36

60S ribosomal protein L6

Ribosomal protein L3

Oxidative phosphorylation

ATPase beta subunit

Reiske iron-sulfur protein precursor

Vacuolar ATP synthase subunit b

Vacuolar-type proton translocating pyrophosphatase 1
